# Supplementary material for: Stratification of candidate genes for Parkinson’s disease using weighted protein-protein interaction network analysis
Source: PubMed Central journal article supplement (PMC6000968; doi:10.1186/s12864-018-4804-9), 2018-06-13
Supplement: 12864_2018_4804_MOESM4_ESM.pdf [file 12864_2018_4804_MOESM4_ESM.pdf]

A

| PD    |         |            |      | Nodes I    |            | IIHs      |           |
|-------|---------|------------|------|------------|------------|-----------|-----------|
| Seeds | Nodes I | Nodes I+II | IIHs | n PS       | n FTD      | n PS      | n FTD     |
| 13    | 286     | 4089       | 24   | 51 (17.8%) | 47 (16.4%) | 9 (37.5%) | 8 (33.3%) |

| PS    |         |            |      | Nodes I    |            | IIHs    |          |
|-------|---------|------------|------|------------|------------|---------|----------|
| Seeds | Nodes I | Nodes I+II | IIHs | n PD       | n FTD      | n PD    | n FTD    |
| 8     | 140     | 2119       | 25   | 51 (36.4%) | 24 (17.1%) | 9 (36%) | 11 (44%) |

| FTD   |         |            |      | Nodes I   |            | IIHs       |           |
|-------|---------|------------|------|-----------|------------|------------|-----------|
| Seeds | Nodes I | Nodes I+II | IIHs | n PS      | n PD       | n PS       | n PD      |
| 12    | 272     | 4191       | 29   | 24 (8.8%) | 47 (17.3%) | 11 (37.9%) | 8 (27.6%) |

B

| IDC  | PD       | IDC  | PS       | IDC  | FTD      |
|------|----------|------|----------|------|----------|
| 0.69 | SQSTM1   | 0.75 | ARRB2    | 0.75 | COPS5    |
| 0.69 | VCP      | 0.75 | EGFR     | 0.75 | EGFR     |
| 0.62 | APP      | 0.75 | FN1      | 0.75 | ESR1     |
| 0.62 | BAG2     | 0.75 | HSP90AA1 | 0.75 | FN1      |
| 0.62 | BIRC2    | 0.75 | USP7     | 0.75 | HSP90AA1 |
| 0.62 | CUL5     | 0.63 | APP      | 0.75 | HSP90AB1 |
| 0.62 | EGFR     | 0.63 | AURKA    | 0.75 | HSPA8    |
| 0.62 | HSP90AA1 | 0.63 | CDK2     | 0.75 | PDCD6IP  |
| 0.62 | HSP90AB1 | 0.63 | CREBBP   | 0.75 | STUB1    |
| 0.62 | LRRK2    | 0.63 | ESR1     | 0.75 | TP53     |
| 0.62 | MDM2     | 0.63 | EZH2     | 0.75 | VCP      |
| 0.62 | PARK2    | 0.63 | GRB2     | 0.67 | APP      |
| 0.62 | PSMD2    | 0.63 | GSK3B    | 0.67 | CDK2     |
| 0.62 | PTGES3   | 0.63 | HIST1H4A | 0.67 | ELAVL1   |
| 0.62 | RIPK1    | 0.63 | HSPA8    | 0.67 | EP300    |
| 0.62 | RNF2     | 0.63 | IKBKE    | 0.67 | FSCN1    |
| 0.62 | TNFRSF1A | 0.63 | MDM2     | 0.67 | GNB2L1   |
| 0.62 | TP53     | 0.63 | PARK2    | 0.67 | HDAC1    |
| 0.62 | TRAF2    | 0.63 | PML      | 0.67 | HSPA4    |
| 0.62 | TRAF6    | 0.63 | RNF2     | 0.67 | HTT      |
| 0.62 | VCAM1    | 0.63 | SP1      | 0.67 | MCM7     |
| 0.62 | YWHAB    | 0.63 | TP53     | 0.67 | PIN1     |
| 0.62 | YWHAQ    | 0.63 | UBE2D3   | 0.67 | PML      |
| 0.62 | YWHAZ    | 0.63 | VCAM1    | 0.67 | RPS3     |
|      |          | 0.63 | YWHAZ    | 0.67 | TCP1     |
|      |          |      |          | 0.67 | TRIM32   |
|      |          |      |          | 0.67 | TUBA1A   |
|      |          |      |          | 0.67 | VCAM1    |
|      |          |      |          | 0.67 | YWHAZ    |
